# Supplementary material for: Population exposure to droughts in China under 1.5 °C global warming target
Source: Copernicus journal article supplement (doi:10.5194/esd-2017-100), 2017-11-07
Supplement: Supplementary file 1 [file esd-2017-100-supplement.pdf]

## Supplement

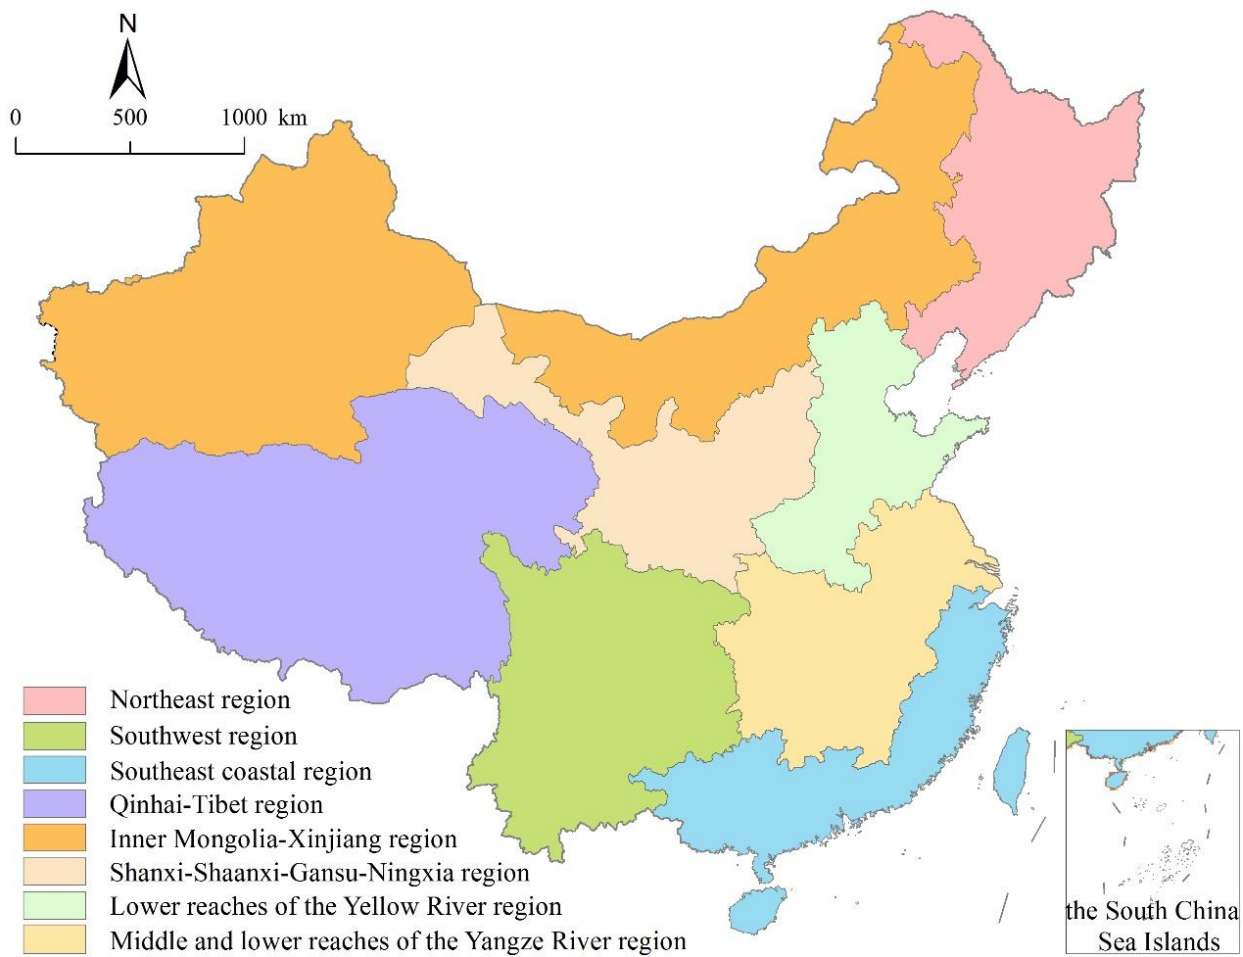

**Fig. S1 Regional divisions of China's population**

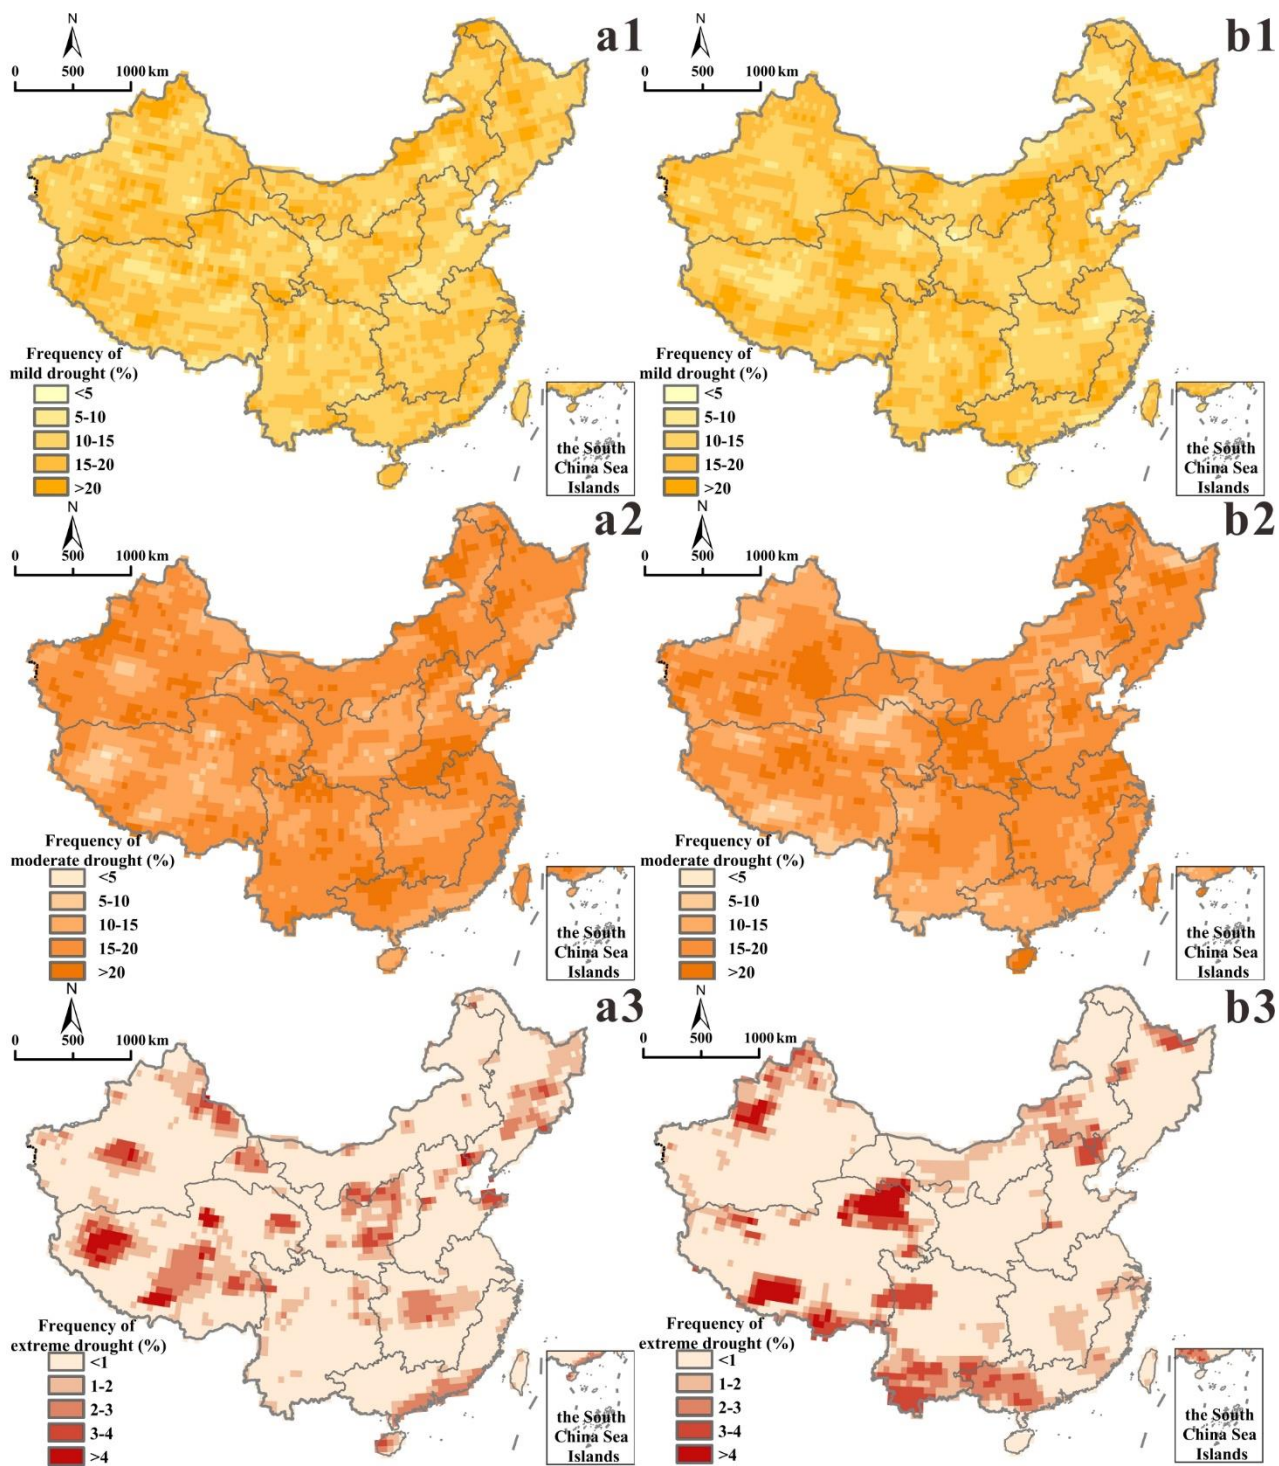

Fig. S2 Spatial distribution of drought frequency for (a) the reference period (1986-2005) and (b) 1.5°C global warming scenario. 1-3, mild droughts (1), moderate droughts (2), extreme droughts (3).

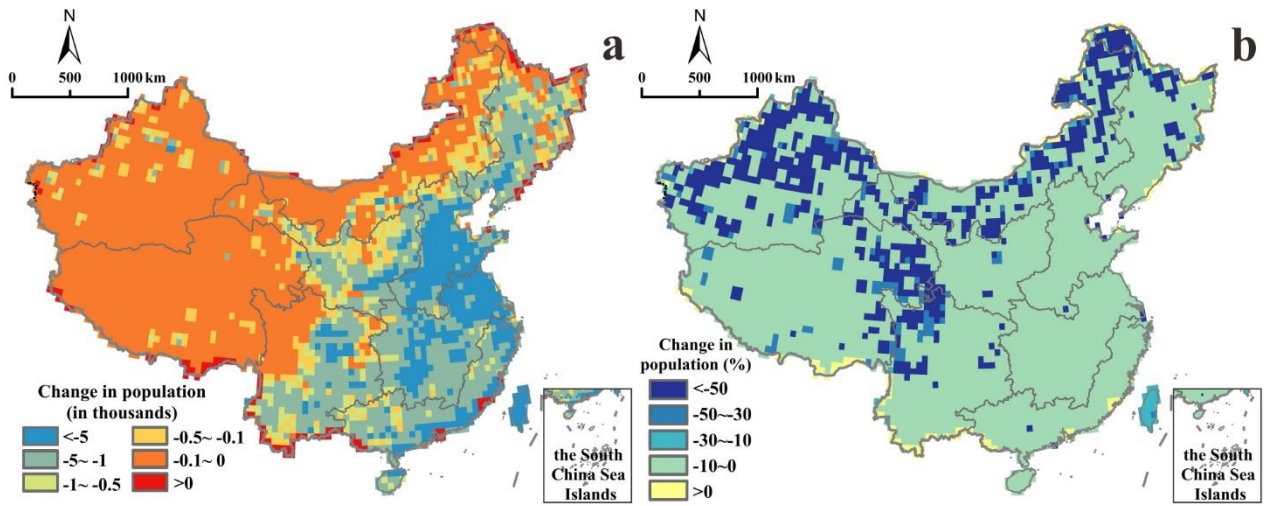

Fig. S3 Change in population, in number (a) and percentage (b), between the reference period and 1.5 °C global warming scenario.
